# Supplementary material for: Racial and Ethnic Differences in Cannabis Use Following Legalization in US States With Medical Cannabis Laws
Source: PubMed Central journal article supplement (PMC8477268; doi:10.1001/jamanetworkopen.2021.27002), 2021-09-27
Supplement: jamanetwopen-e2127002-s001.pdf [file jamanetwopen-e2127002-s001.pdf]

## Supplemental Online Content

Martins SS, Segura LE, Levy NS, et al. Racial and ethnic differences in cannabis use following legalization in US states with medical cannabis laws. *JAMA Netw Open*. 2021;4(9):e2127002. doi:10.1001/jamanetworkopen.2021.27002

**eAppendix.** Example Code on the Time-Varying Indicator of Cannabis Legalization Status

**eTable 1.** Dates when RCLs Became Effective

**eTable 2.** Mapping of *DSM-5* and *DSM-IV* Cannabis Use Disorder Criteria

This supplemental material has been provided by the authors to give readers additional information about their work.

## eAppendix. Example Code on the Time-Varying Indicator of Cannabis Legalization Status

### Step 0. Loading libraries, files, and datasets. Merging files.

Load libraries used in this session

```
library(tidyverse)
```

Load file containing effective RCL and MCL dates compiled from existing literature, Marijuana Policy Project, ProCon, The National Alliance for Model State Drug Laws, The National Conference of State Legislatures, The Prescription Drug Abuse Policy System, and the Alcohol Policy Information System.

```
policyDates <- read.csv("CannabisPolicyDates.csv")
```

Load NSDUH dataset

```
nsduh <- load("NSDUH.RData")
```

Join policyDates file to NSDUH dataset by state FIPS code

```
dataset <- left_join(nsduh, policyDates, by = c("states_FIPS"))
```

### Step 1. Create a time-fixed indicator of MCL/RCL status used for descriptive analysis in TABLE 1.

This variable indicates whether an individual lived in a state that never had an effective RCL or MCL law (`never_mcl_rcl`), or ever had an effective MCL (`ever_mcl`), or ever having an effective RCL (`ever_rcl`).

```
dataset <- dataset %>%  
  mutate(never_mcl_rcl = factor(ifelse(is.na(mcl_effective_date) == T &  
                                     is.na(rcl_effective_date) == T, 1, 0),  
                                labels = c("Ever MCL & RCL", "Never MCL & RCL")),  
         ever_mcl = factor(ifelse(is.na(mcl_effective_date) == F, 1, 0),  
                            labels = c("Never MCL", "Ever MCL")),  
         ever_rcl = factor(ifelse(is.na(rcl_effective_date) == F, 1, 0),  
                            labels = c("Never RCL", "Ever RCL")))
```

### Step 2. Create a time-varying indicator of living in a state that had an effective MCL or RCL at the time of interview.

For each survey year, we compared individuals' interview date (`refdate`) to MCL/RCL effective date to determine RCL/MCL time-varying status. For example, if in year X interview date was < than RCL effective date then the individual lived in a state before RCL was effective in year X. Conversely if `refdate` > than RCL effective date then the individual lived in a state after RCL was

effective in year X. This variable was used for our main analysis (Tables 2 and 3). The contrast of interest was After RCL, After MCL vs Before RCL, After MCL.

```
dataset <- dataset %>%  
  
  mutate(mcl_status = factor(iffelse(is.na(mcl_effective_date) == T, 1,  
    iffelse(is.na(mcl_effective_date) == F &  
      refdate <= mcl_effective_date, 2,  
      iffelse(is.na(mcl_effective_date) == F &  
        refdate > mcl_effective_date, 3, 9999))),  
    labels = c("Never MCL", "Before MCL", "After MCL")),  
  rcl_status = factor(iffelse(is.na(rcl_effective_date) == T, 1,  
    iffelse(is.na(rcl_effective_date) == F &  
      refdate <= rcl_effective_date, 2,  
      iffelse(is.na(rcl_effective_date) == F &  
        refdate > rcl_effective_date, 3, 9999))),  
    labels = c("Never RCL", "Before RCL", "After RCL")),  
  mcl_rcl_status = factor(iffelse(is.na(mcl_effective_date) == T &  
    is.na(rcl_effective_date) == T, 1,  
    iffelse(is.na(mcl_effective_date) == F &  
      is.na(rcl_effective_date) == T &  
        refdate <= mcl_effective_date, 2,  
      iffelse(is.na(mcl_effective_date) == F &  
        is.na(rcl_effective_date) == T &  
          refdate > mcl_effective_date, 3,  
        iffelse(is.na(mcl_effective_date) == F &  
          is.na(rcl_effective_date) == F &  
            refdate <= mcl_effective_date &  
              refdate <= rcl_effective_date, 4,  
            iffelse(is.na(mcl_effective_date) == F &  
              is.na(rcl_effective_date) == F &  
                refdate > mcl_effective_date &  
                  refdate <= rcl_effective_date, 5,  
                iffelse(is.na(mcl_effective_date) == F &
```

```
is.na(rcl_effective_date) == F &
refdate > mcl_effective_date &
refdate > rcl_effective_date, 6, 9999))))),
labels = c("Never MCL & RCL",
           "Before MCL, Never RCL",
           "After MCL, Never RCL",
           "Before MCL, Before RCL",
           "After MCL, Before RCL",
           "After MCL, After RCL")))
```

eTable 1. Dates When RCLs Became Effective

| State         | RCL Effective Date |
|---------------|--------------------|
| Alaska        | 2/24/15            |
| Arizona       | NA                 |
| Arkansas      | NA                 |
| California    | 11/9/16            |
| Colorado      | 12/10/12           |
| Connecticut   | NA                 |
| Delaware      | NA                 |
| Florida       | NA                 |
| Hawaii        | NA                 |
| Illinois      | NA                 |
| Louisiana     | NA                 |
| Maine         | 1/30/17            |
| Maryland      | NA                 |
| Massachusetts | 12/15/16           |
| Michigan      | 12/6/18            |
| Minnesota     | NA                 |
| Missouri      | NA                 |
| Montana       | NA                 |
| Nevada        | 1/1/17             |
| New Hampshire | NA                 |
| New Jersey    | NA                 |
| New Mexico    | NA                 |
| New York      | NA                 |
| North Dakota  | NA                 |
| Ohio          | NA                 |
| Oklahoma      | NA                 |
| Oregon        | 3/29/16            |
| Pennsylvania  | NA                 |

|                      |         |
|----------------------|---------|
| Rhode Island         | NA      |
| Utah                 | NA      |
| Vermont              | 7/1/18  |
| Washington           | 12/6/12 |
| District of Columbia | 2/26/15 |
| West Virginia        | NA      |

Sources: 33 Legal Medical Marijuana States and DC: Laws, Fees, and Possession Limits;<sup>28</sup> Legal Recreational Marijuana States and DC: Cannabis Laws with Possession and Cultivation Limits;<sup>1</sup> State by State MML Report;<sup>27</sup> The National Alliance for Model State Drug Laws;<sup>29</sup> The National Conference of State Legislatures;<sup>30</sup> The Prescription Drug Abuse Policy System;<sup>31</sup> and the Alcohol Policy Information System.<sup>32</sup>

eTable 2. Mapping of *DSM-5* and *DSM-IV* Cannabis Use Disorder Criteria

| <b>DSM-5 Cannabis Use Disorder Criteria</b>                                                                                                                         | <b>DSM-IV Cannabis Use Disorder Criteria</b>                                                                                                                                                                                                                                                                                                                                                            |
|---------------------------------------------------------------------------------------------------------------------------------------------------------------------|---------------------------------------------------------------------------------------------------------------------------------------------------------------------------------------------------------------------------------------------------------------------------------------------------------------------------------------------------------------------------------------------------------|
| <i>Criterion 1:</i> Using cannabis is larger amounts or over a longer period than was intended                                                                      | <i>Dependence Criterion 3:</i> During the past 12 months, did you try to set limits on how often or how much marijuana or hashish you would use? Were you able to keep to the limits you set, or did you often use marijuana or hashish more than you intended to?                                                                                                                                      |
| <i>Criterion 2:</i> Persistent desire or unsuccessful efforts to cut down or control cannabis use                                                                   | <i>Dependence Criterion 4:</i> During the past 12 months, did you want to or try to cut down or stop using marijuana or hashish? During the past 12 months, were you able to cut down or stop using marijuana or hashish every time you wanted to or tried to?                                                                                                                                          |
| <i>Criterion 3:</i> A great deal of time is spent in activities necessary to obtain cannabis, use cannabis, or recover from its effects                             | <i>Dependence Criterion 5:</i> During the past 12 months, was there a month or more when you spent a lot of your time getting or using marijuana or hashish? During the past 12 months, was there a month or more when you spent a lot of your time getting over the effects of the marijuana or hashish you used?                                                                                      |
| <i>Criterion 4:</i> Craving, or a strong desire or urge to use cannabis                                                                                             | <i>Not assessed</i>                                                                                                                                                                                                                                                                                                                                                                                     |
| <i>Criterion 5:</i> Recurrent cannabis use resulting in a failure to fulfill major role obligations at work, school, or home                                        | <i>Abuse Criterion 1:</i> Sometimes people who use marijuana or hashish have serious problems at home, work or school — such as: neglecting their children, missing work or school, doing a poor job at work or school, losing a job or dropping out of school. During the past 12 months, did using marijuana or hashish cause you to have serious problems like this either at home, work, or school? |
| <i>Criterion 6:</i> Continued cannabis use despite having persistent or recurrent social or interpersonal problems caused or exacerbated by the effects of cannabis | <i>Abuse Criterion 4:</i> During the past 12 months, did you have any problems with family or friends that were probably caused by your use of marijuana or hashish? Did you continue to use marijuana or hashish even though you thought it caused problems with family or friends?                                                                                                                    |
| <i>Criterion 7:</i> Important social, occupational, or recreational activities are given up or reduced because of cannabis use                                      | <i>Dependence Criterion 6:</i> This question is about important activities such as working, going to school, taking care of children, doing fun things such as hobbies and sports, and spending time with friends and family. During the past 12 months, did using marijuana or hashish cause you to give up or spend less time doing these types of important activities?                              |
| <i>Criterion 8:</i> Recurrent cannabis use in situations in which it is physically hazardous                                                                        | <i>Abuse Criterion 2:</i> During the past 12 months, did you regularly use marijuana or hashish and then do                                                                                                                                                                                                                                                                                             |

|                                                                                                                                                                                                            |                                                                                                                                                                                                                                                                                                                                                                                                                                                                                                                                                                                                                                                         |
|------------------------------------------------------------------------------------------------------------------------------------------------------------------------------------------------------------|---------------------------------------------------------------------------------------------------------------------------------------------------------------------------------------------------------------------------------------------------------------------------------------------------------------------------------------------------------------------------------------------------------------------------------------------------------------------------------------------------------------------------------------------------------------------------------------------------------------------------------------------------------|
|                                                                                                                                                                                                            | <p>something where using marijuana or hashish might have put you in physical danger?</p>                                                                                                                                                                                                                                                                                                                                                                                                                                                                                                                                                                |
| <p><i>Criterion 9:</i> Cannabis use is continued despite knowledge of having a persistent or recurrent physical or psychological problem that is likely to have been caused or exacerbated by cannabis</p> | <p><i>Dependence Criterion 7:</i> During the past 12 months, did you have any problems with your emotions, nerves, or mental health that were probably caused or made worse by your use of marijuana or hashish? Did you continue to use marijuana or hashish even though you thought it was causing you to have problems with your emotions, nerves, or mental health?</p> <p>During the past 12 months, did you have any physical health problems that were probably caused or made worse by your use of marijuana or hashish? Did you continue to use marijuana or hashish even though you thought it was causing you to have physical problems?</p> |
| <p><i>Criterion 10:</i> Tolerance</p>                                                                                                                                                                      | <p><i>Dependence Criterion 1:</i> During the past 12 months, did you need to use more marijuana or hashish than you used to in order to get the effect you wanted?</p> <p>OR</p> <p>During the past 12 months, did you notice that using the same amount of marijuana or hashish had less effect on you than it used to?</p>                                                                                                                                                                                                                                                                                                                            |
| <p><i>Criterion 11:</i> Withdrawal</p>                                                                                                                                                                     | <p><i>Not assessed</i></p>                                                                                                                                                                                                                                                                                                                                                                                                                                                                                                                                                                                                                              |
